# Supplementary material
Source: MDPI journal article supplement (https://www.mdpi.com/2571-9637/5/4/30)
Supplement: s1 [file s1]

# Supplementary Materials:

## Removal of Model Aromatic Hydrocarbons from Aqueous Media with a Ferric Sulfate–Lime Softening Coagulant System

Deysi J. Venegas-García and Lee D. Wilson \*

Department of Chemistry, University of Saskatchewan, 110 Science Place, Thorvaldson Building, Saskatoon, SK S7N 5C9, Canada

\* Correspondence: lee.wilson@usask.ca; Tel.: +1-306-966-2961

### *Box-Behnken Experimental Design*

Experimental design contains 3 factors with 2 replicates with a base runs of 15 and 30 total runs, including 6 center points for each system (PNP and naphthalene).

**Table S1.** Box-Behnken experimental design for the removal of pollutants.

| Run | PNP                   |                       |               | Naphthalene           |                       |               |
|-----|-----------------------|-----------------------|---------------|-----------------------|-----------------------|---------------|
|     | Ferric sulfate (mg/L) | Lime (%) <sup>*</sup> | Initial conc. | Ferric sulfate (mg/L) | Lime (%) <sup>*</sup> | Initial conc. |
| 1   | 10                    | 50                    | 18            | 30                    | 50                    | 13            |
| 2   | 100                   | 50                    | 18            | 100                   | 50                    | 13            |
| 3   | 10                    | 200                   | 18            | 30                    | 200                   | 13            |
| 4   | 100                   | 200                   | 18            | 100                   | 200                   | 13            |
| 5   | 10                    | 125                   | 1             | 30                    | 125                   | 1             |
| 6   | 100                   | 125                   | 1             | 100                   | 125                   | 1             |
| 7   | 10                    | 125                   | 35            | 30                    | 125                   | 25            |
| 8   | 100                   | 125                   | 35            | 100                   | 125                   | 25            |
| 9   | 55                    | 50                    | 1             | 65                    | 50                    | 1             |
| 10  | 55                    | 200                   | 1             | 65                    | 200                   | 1             |
| 11  | 55                    | 125                   | 35            | 65                    | 125                   | 25            |
| 12  | 55                    | 125                   | 35            | 65                    | 125                   | 25            |
| 13  | 55                    | 125                   | 18            | 65                    | 125                   | 13            |
| 14  | 55                    | 125                   | 18            | 65                    | 125                   | 13            |
| 15  | 55                    | 125                   | 18            | 65                    | 125                   | 13            |

<sup>\*</sup> The lime dosage is based on a percent concentration relative to that for ferric sulfate.

## ANOVA

Model summary showed statistical parameters that include  $R^2$  value= 93.1%;  $R^2$  (adj) = 91.0% and  $R^2$  (pred) = 89.1% for PNP data analysis.

Table S2. Analysis of variance for PNP

| Source            | DF | Adj SS  | Adj MS  | F-Value | P-Value |
|-------------------|----|---------|---------|---------|---------|
| Model             | 9  | 1441.09 | 160.121 | 33.61   | 0.000   |
| Linear            | 3  | 995.12  | 331.707 | 69.64   | 0.000   |
| PNP               | 1  | 928.20  | 928.200 | 194.86  | 0.000   |
| Fe (III)          | 1  | 22.33   | 22.335  | 4.69    | 0.043   |
| Lime              | 1  | 44.59   | 44.585  | 9.36    | 0.006   |
| Square            | 3  | 475.39  | 158.462 | 33.27   | 0.000   |
| PNP*PNP           | 1  | 51.05   | 51.046  | 10.72   | 0.004   |
| Fe (III)*Fe (III) | 1  | 22.51   | 22.508  | 4.73    | 0.042   |
| Lime*Lime         | 1  | 385.04  | 385.037 | 80.83   | 0.000   |
| 2-Way Interaction | 3  | 2.38    | 0.795   | 0.17    | 0.917   |
| PNP*Fe (III)      | 1  | 0.50    | 0.500   | 0.10    | 0.749   |
| PNP*Lime          | 1  | 0.60    | 0.605   | 0.13    | 0.725   |
| Fe (III)*Lime     | 1  | 1.28    | 1.280   | 0.27    | 0.610   |
| Error             | 8  | 95.27   | 4.763   |         |         |
| Lack-of-Fit       | 5  | 95.26   | 31.752  | 25.38   | 0.0562  |
| Pure Error        | 3  | 0.01    | 0.001   |         |         |
| Total             | 17 | 1536.35 |         |         |         |

Model summary showed statistical parameters that include  $R^2$  value= 96.6%;  $R^2$  (adj) = 95.0% and  $R^2$  (pred) = 93.4% for naphthalene data analysis.

**Table S3.** Analysis of variance for naphthalene

| Source                  | DF | Adj SS  | Adj MS  | F-Value | P-Value |
|-------------------------|----|---------|---------|---------|---------|
| Model                   | 9  | 1192.29 | 132.477 | 62.53   | 0.000   |
| Linear                  | 3  | 516.12  | 172.042 | 81.20   | 0.000   |
| NAPHTHALENE             | 1  | 495.06  | 495.062 | 233.66  | 0.000   |
| Fe (III)                | 1  | 5.06    | 5.063   | 2.39    | 0.138   |
| LIME                    | 1  | 16.00   | 16.000  | 7.55    | 0.012   |
| Square                  | 3  | 666.92  | 222.306 | 104.92  | 0.000   |
| NAPHTHALENE*NAPHTHALENE | 1  | 666.46  | 666.462 | 314.55  | 0.000   |
| Fe (III)*Fe (III)       | 1  | 1.85    | 1.846   | 0.87    | 0.362   |
| LIME*LIME               | 1  | 2.88    | 2.885   | 1.36    | 0.257   |
| 2-Way Interaction       | 3  | 9.25    | 3.083   | 1.46    | 0.257   |
| NAPHTHALENE*Fe (III)    | 1  | 8.00    | 8.000   | 3.78    | 0.066   |
| NAPHTHALENE*LIME        | 1  | 0.12    | 0.125   | 0.06    | 0.811   |
| Fe (III)*LIME           | 1  | 1.13    | 1.125   | 0.53    | 0.475   |
| Error                   | 7  | 42.38   | 2.119   |         |         |
| Lack-of-Fit             | 3  | 32.38   | 10.792  | 18.35   | 0.0703  |
| Pure Error              | 4  | 10.00   | 0.588   |         |         |
| Total                   | 16 | 1234.67 |         |         |         |
